# Supplementary material
Source: PubMed Central journal article supplement (PMC5966906)
Supplement: SC-007-C5SC03287C-s001.pdf [file SC-007-C5SC03287C-s001.pdf]

**Supplementary Information for**

**Calcium-induced Tetramerization and Zinc Chelation Shield Human Calprotectin from  
Degradation by Host and Bacterial Extracellular Proteases**

Jules R. Stephan and Elizabeth M. Nolan\*

Department of Chemistry, Massachusetts Institute of Technology, Cambridge, MA 02139, USA

\*Corresponding author: [lnolan@mit.edu](mailto:lnolan@mit.edu)

Phone: 617-452-2495

Fax: 617-324-0505

This Supplementary Information section includes:

|                                                                                                   |     |
|---------------------------------------------------------------------------------------------------|-----|
| <b>Supplementary Table and Figures</b> .....                                                      | S3  |
| <b>Table S1.</b> Primers for tetramer-deficient mutants and GluC cleavage product.....            | S3  |
| <b>Table S2.</b> Extinction coefficients and molecular weights of proteins.....                   | S4  |
| <b>Table S3.</b> Mass spectrometric analysis of CP-Ser and variants.....                          | S4  |
| <b>Table S4.</b> SEC elution volumes and calculated molecular weights.....                        | S5  |
| <b>Table S5.</b> SEDFIT sedimentation coefficients for CP-Ser and tetramer-deficient variants..   | S6  |
| <b>Table S6.</b> DCDT+ sedimentation coefficients for CP-Ser and tetramer-deficient variants...   | S7  |
| <b>Fig. S1.</b> Amino acid sequences and potential protease cleavage sites in CP-Ser.....         | S8  |
| <b>Fig. S2.</b> SDS-PAGE of CP-Ser and variants.....                                              | S9  |
| <b>Fig. S3.</b> CD spectra of CP-Ser and variants.....                                            | S10 |
| <b>Fig. S4.</b> Mn(II) competition titrations of CP-Ser and variants.....                         | S11 |
| <b>Fig. S5.</b> Mn(II) competition titrations of CP-Ser and variants with addition of Ca(II)..... | S12 |
| <b>Fig. S6.</b> SEC of CP-Ser and tetramer-deficient variants with Mn(II).....                    | S13 |
| <b>Fig. S7.</b> SEC of CP-Ser and tetramer deficient variants with Fe(II).....                    | S14 |
| <b>Fig. S8.</b> SEDFIT sedimentation distributions and residuals bitmaps.....                     | S15 |
| <b>Fig. S9.</b> DCDT+ sedimentation distributions and residuals plots.....                        | S16 |
| <b>Fig. S10.</b> HPLC traces and LCMS of undigested CP-Ser and tetramer-deficient mutants...      | S17 |
| <b>Fig. S11.</b> Full HPLC chromatograms of CP-Ser, I60K, and I60E trypsin digestions.....        | S18 |
| <b>Fig. S12.</b> Full HPLC chromatograms of CP-Ser, I60K, and I60E chymotrypsin digestions..      | S19 |
| <b>Fig. S13.</b> Full HPLC chromatograms of CP-Ser, I60K, and I60E HNE digestions.....            | S20 |
| <b>Fig. S14.</b> Antibacterial activity of CP-Ser, I60K, and I60E.....                            | S21 |
| <b>Fig. S15.</b> HPLC chromatograms of trypsin-treated and untreated proteins for AMAs.....       | S22 |
| <b>Fig. S16.</b> Full HPLC chromatograms of CP-Ser, I60K, and I60E GluC digestions.....           | S23 |
| <b>Fig. S17.</b> SEC of CP-Ser and $\Delta$ SHKE with and without Ca(II).....                     | S24 |
| <b>Fig. S18.</b> Antibacterial activity of CP-Ser and $\Delta$ SHKE.....                          | S25 |
| <b>Fig. S19.</b> Trypsin activity assay.....                                                      | S26 |
| <b>Fig. S20.</b> Chymotrypsin activity assay.....                                                 | S27 |
| <b>Fig. S21.</b> Human neutrophil elastase activity assay.....                                    | S28 |
| <b>Fig. S22.</b> Glutamyl endopeptidase activity assay.....                                       | S29 |
| <b>Supplementary References</b> .....                                                             | S30 |

**Table S1.** Primers employed for site-directed mutagenesis.<sup>a</sup>

| Primer               | Sequence <sup>b</sup>                              |
|----------------------|----------------------------------------------------|
| I60K-1               | 5'-GTTTAAGGAGTTGGAC <u>AAG</u> AACACGGATGGCGCTG-3' |
| I60K-2               | 5'-CAGCGCCATCCGTGTT <u>CTT</u> GTCCAACCTCTTAAAC-3' |
| I60E-1               | 5'-GTTTAAGGAGTTGGAC <u>GAA</u> AACACGGATGGCGCTG-3' |
| I60E-2               | 5'-CAGCGCCATCCGTGTT <u>TTC</u> GTCCAACCTCTTAAAC-3' |
| ΔSHKE-1 <sup>c</sup> | 5'-GAAGAGCCACGAAGAG <u>TAA</u> CATAAAGAGTAACTC-3'  |
| ΔSHKE-2 <sup>c</sup> | 5'-GAGTACTCTTTATG <u>TTA</u> CTCTTCGTGGCTCTTC-3'   |

<sup>a</sup> pET41a-S100A8(C42S) was employed as the template plasmid. This plasmid has the S100A8(C42S) gene inserted between the *Nde*I and *Xho*I restriction sites.<sup>S1</sup> <sup>b</sup> The codons containing mutations are underlined and colored red. <sup>c</sup> These primers provide a stop codon at position 90 (S90Stop).

**Table S2.** Molecular weights and extinction coefficients for proteins used in this study.

| Protein                         | Molecular Weight (Da) <sup>a</sup> | $\epsilon_{280}$ (M <sup>-1</sup> cm <sup>-1</sup> ) <sup>b</sup> |
|---------------------------------|------------------------------------|-------------------------------------------------------------------|
| A8(C42S)                        | 10 818.5                           | 11 460                                                            |
| A8(C42S)(I60K)                  | 10 833.5                           | 11 460                                                            |
| A8(C42S)(I60E)                  | 10 834.5                           | 11 460                                                            |
| A8(C42S)( $\Delta$ SHKE)        | 10 336.9                           | 11 460                                                            |
| A9(C3S)                         | 13 094.7 <sup>c</sup>              | 6 990                                                             |
| Trypsin                         | 23 300                             | 30 000 <sup>S2</sup>                                              |
| Chymotrypsin                    | 25 000                             | 50 000 <sup>S3</sup>                                              |
| Glutamyl endopeptidase (GluC)   | 30 000                             | -                                                                 |
| Human neutrophil elastase (HNE) | 28 500                             | -                                                                 |

<sup>a</sup> Molecular weights were calculated by using the ProtParam tool available on the ExPASy server (<http://web.expasy.org/protparam>). <sup>b</sup> Extinction coefficients (280 nm) were calculated by using the ProtParam tool. <sup>c</sup> In all preparations, LCMS revealed that the dominant purified species lacked the N-terminal methionine. The peptide molecular weight is the theoretical value for S100A9(C3S) lacking the N-terminal Met residue.

**Table S3.** Mass spectrometric analysis of CP-Ser and variants.

| CP-Ser Variant | S100A8 Observed Mass (g/mol) | S100A9 Observed Mass <sup>a</sup> (g/mol) |
|----------------|------------------------------|-------------------------------------------|
| CP-Ser         | 10 818.6                     | 13 094.7                                  |
| I60K           | 10 833.7                     | 13 095.0                                  |
| I60E           | 10 834.7                     | 13 094.9                                  |
| $\Delta$ SHKE  | 10 337.1                     | 13 095.0                                  |

<sup>a</sup> In all preparations, the dominant purified species of the S100A9 subunit lacked the N-terminal methionine. The masses reported here are the observed values for S100A9(C3S) lacking the N-terminal Met residue.

**Table S4.** Analytical SEC elution volumes and calculated molecular weights.<sup>a</sup>

| Ca(II) | Mn(II) | Fe(II) | Protein | Elution Volume<br>(mL) | Calculated Molecular Weight<br>(kDa) |
|--------|--------|--------|---------|------------------------|--------------------------------------|
| -      | -      | -      | CP-Ser  | 11.5                   | 34.9                                 |
| -      | -      | -      | I60K    | 11.5                   | 34.9                                 |
| -      | -      | -      | I60E    | 11.5                   | 34.9                                 |
| -      | -      | -      | ΔSHKE   | 11.7                   | 32.2                                 |
| +      | -      | -      | CP-Ser  | 10.7                   | 48.2                                 |
| +      | -      | -      | I60K    | 11.8                   | 31.0                                 |
| +      | -      | -      | I60E    | 11.8                   | 31.0                                 |
| +      | -      | -      | ΔSHKE   | 10.9                   | 44.5                                 |
| -      | -      | +      | CP-Ser  | 11.0                   | 42.7                                 |
| -      | -      | +      | I60K    | 11.0                   | 42.7                                 |
| -      | -      | +      | I60E    | 11.1                   | 41.0                                 |
| +      | -      | +      | CP-Ser  | 11.0                   | 42.7                                 |
| +      | -      | +      | I60K    | 11.1                   | 41.0                                 |
| +      | -      | +      | I60E    | 11.1                   | 41.0                                 |
| -      | +      | -      | CP-Ser  | 11.0                   | 42.7                                 |
| -      | +      | -      | I60K    | 11.5                   | 34.9                                 |
| -      | +      | -      | I60E    | 11.5                   | 34.9                                 |
| +      | +      | -      | CP-Ser  | 11.1                   | 41.0                                 |
| +      | +      | -      | I60K    | 10.9                   | 44.5                                 |
| +      | +      | -      | I60E    | 11.1                   | 41.0                                 |

<sup>a</sup> Each sample contained 30 μM protein (75 mM HEPES, 100 mM NaCl, pH 7.5). The +Ca(II) samples contained 600 μM Ca(II) in the sample and running buffer. The +Mn(II) samples contained 300 μM Mn(II) in the sample only. In the +Ca(II) +Mn(II) experiments, the running buffer and sample contained 600 μM Ca(II) and only the sample contain 33 μM Mn(II). The experiments were performed at 4 °C.

**Table S5.** Calculated sedimentation coefficients and molecular weights using Sedfit.<sup>a</sup>

| Protein             | Concentration<br>( $\mu\text{M}$ ) | $s_{20,w}$ (S)       | MW (kDa)   | Partial Specific<br>Volume (mL/g) |
|---------------------|------------------------------------|----------------------|------------|-----------------------------------|
| CP-Ser <sup>b</sup> | 27.5                               | 2.4                  | 22.7       | 0.7388                            |
| CP-Ser <sup>d</sup> | 27.5                               | 3.9                  | 43.5       | 0.7388                            |
| CP-Ser <sup>e</sup> | 27.5                               | 2.4 (35%), 4.1 (65%) | 20.6, 46.1 | 0.7388                            |
| CP-Ser <sup>f</sup> | 27.5                               | 4.5 (85%), 6.5 (15%) | 40.8, 70.8 | 0.7388                            |
| I60K <sup>c</sup>   | 27.5                               | 2.4                  | 23.0       | 0.7388                            |
| I60K <sup>d</sup>   | 27.5                               | 2.4                  | 24.1       | 0.7388                            |
| I60K <sup>e</sup>   | 27.5                               | 2.4 (73%), 4.1 (27%) | 22.9, 51.3 | 0.7388                            |
| I60K <sup>f</sup>   | 27.5                               | 4.1 S                | 43.7       | 0.7388                            |
| I60E <sup>c</sup>   | 27.5                               | 2.3                  | 22.8       | 0.7388                            |
| I60E <sup>d</sup>   | 27.5                               | 2.3                  | 24.9       | 0.7388                            |
| I60E <sup>e</sup>   | 27.5                               | 2.2 (84%), 3.9 (16%) | 23.8, 56.0 | 0.7388                            |
| I60E <sup>f</sup>   | 27.5                               | 4.0                  | 44.9       | 0.7388                            |

<sup>a</sup> All experiments were conducted at 20 °C. The units of viscosity are in centipoise (cP) (1 Poise  $\text{g cm}^{-1} \text{s}^{-1}$ ). Sedimentation coefficients are in Svedbergs (1 Svedberg = 100 fs =  $1 \times 10^{-13}$  s). The c(s) method was used for fitting the data. All scans that began at the baseline were used in fitting. <sup>b</sup> The sample buffer was 75 mM HEPES, 100 mM NaCl, 1.35 mM EDTA, pH 7.5.  $s_{20,w}$  values were adjusted with solvent density ( $\rho$ ) of 1.00825 g/mL, solvent viscosity ( $\eta$ ) of 1.0563 cP, and pH 7.5 at 20 °C. <sup>c</sup> The sample buffer was 75 mM HEPES, 100 mM NaCl, pH 7.5.  $s_{20,w}$  values were adjusted with solvent density ( $\rho$ ) of 1.0082 g/mL, solvent viscosity ( $\eta$ ) of 1.0565 cP, and pH 7.5 at 20 °C. <sup>d</sup> The sample buffer was 75 mM HEPES, 100 mM NaCl, 540  $\mu\text{M}$   $\text{CaCl}_2$ , and pH 7.5.  $s_{20,w}$  values were adjusted with solvent density ( $\rho$ ) of 1.0082 g/mL, solvent viscosity ( $\eta$ ) of 1.0565 cP, and pH 7.5 at 20 °C. <sup>e</sup> The sample buffer was 75 mM HEPES, 100 mM NaCl, 27.5  $\mu\text{M}$   $\text{MnCl}_2$ , pH 7.5.  $s_{20,w}$  values were adjusted with solvent density ( $\rho$ ) of 1.0082 g/mL, solvent viscosity ( $\eta$ ) of 1.0565 cP, and pH 7.5 at 20 °C. <sup>f</sup> The sample buffer was 75 mM HEPES, 100 mM NaCl, 540  $\mu\text{M}$   $\text{CaCl}_2$ , 27.5  $\mu\text{M}$   $\text{MnCl}_2$ , pH 7.5.  $s_{20,w}$  values were adjusted with solvent density ( $\rho$ ) of 1.0082 g/mL, solvent viscosity ( $\eta$ ) of 1.0565 cP, and pH 7.5 at 20 °C.

**Table S6.** Calculated sedimentation coefficients and molecular weights using DCDT+.<sup>a</sup>

| Protein             | Concentration<br>( $\mu\text{M}$ ) | $s_{20,w}$ (S) | D (F) | MW (kDa) | Partial Specific<br>Volume (mL/g) |
|---------------------|------------------------------------|----------------|-------|----------|-----------------------------------|
| CP-Ser <sup>b</sup> | 27.5                               | 2.4            | 12.0  | 18.8     | 0.7388                            |
| CP-Ser <sup>d</sup> | 27.5                               | 3.8            | 7.80  | 45.3     | 0.7388                            |
| CP-Ser <sup>e</sup> | 27.5                               | 3.6            | 10.7  | 31.2     | 0.7388                            |
| CP-Ser <sup>f</sup> | 27.5                               | 4.8            | 12.5  | 35.6     | 0.7388                            |
| I60K <sup>c</sup>   | 27.5                               | 2.3            | 11.8  | 18.7     | 0.7388                            |
| I60K <sup>d</sup>   | 27.5                               | 2.6            | 13.3  | 17.9     | 0.7388                            |
| I60K <sup>e</sup>   | 27.5                               | 2.8            | 12.3  | 13.5     | 0.7388                            |
| I60K <sup>f</sup>   | 27.5                               | 4.1            | 8.9   | 42.8     | 0.7388                            |
| I60E <sup>c</sup>   | 27.5                               | 2.4            | 10.8  | 20.9     | 0.7388                            |
| I60E <sup>d</sup>   | 27.5                               | 2.5            | 10.8  | 22.3     | 0.7388                            |
| I60E <sup>e</sup>   | 27.5                               | 2.7            | 13.4  | 18.8     | 0.7388                            |
| I60E <sup>f</sup>   | 27.5                               | 4.0            | 8.4   | 44.4     | 0.7388                            |

<sup>a</sup> All experiments were conducted at 20 °C. The units of viscosity are in centipoise (cP) (1 Poise  $\text{g cm}^{-1} \text{s}^{-1}$ ). Sedimentation coefficients are in Svedbergs (1 Svedberg = 100 fs =  $1 \times 10^{-13}$  s). Diffusion coefficients correspond to the best-fit molecular mass in Fick units (1 Fick =  $1 \times 10^{-7}$   $\text{cm}^2/\text{s}$ ). The dc/dt method was used for all data except the following: CP-Ser+Ca(II) where  $g(s^*)$  was used. The typical scan range was 14-21 and the peak broadening limit was always greater than 60 kDa. For the manganese samples, only six scans were used. <sup>b</sup> The sample buffer was 75 mM HEPES, 100 mM NaCl, 1.35 mM EDTA, pH 7.5.  $s_{20,w}$  values were adjusted with solvent density ( $\rho$ ) of 1.00825 g/mL, solvent viscosity ( $\eta$ ) of 1.0563 cP, and pH 7.5 at 20 °C. <sup>c</sup> The sample buffer was 75 mM HEPES, 100 mM NaCl, pH 7.5.  $s_{20,w}$  values were adjusted with solvent density ( $\rho$ ) of 1.0082 g/mL, solvent viscosity ( $\eta$ ) of 1.0565 cP, and pH 7.5 at 20 °C. <sup>d</sup> The sample buffer was 75 mM HEPES, 100 mM NaCl, 540  $\mu\text{M}$   $\text{CaCl}_2$ , and pH 7.5.  $s_{20,w}$  values were adjusted with solvent density ( $\rho$ ) of 1.0082 g/mL, solvent viscosity ( $\eta$ ) of 1.0565 cP, and pH 7.5 at 20 °C. <sup>e</sup> The sample buffer was 75 mM HEPES, 100 mM NaCl, 27.5  $\mu\text{M}$   $\text{MnCl}_2$ , pH 7.5.  $s_{20,w}$  values were adjusted with solvent density ( $\rho$ ) of 1.0082 g/mL, solvent viscosity ( $\eta$ ) of 1.0565 cP, and pH 7.5 at 20 °C. <sup>f</sup> The sample buffer was 75 mM HEPES, 100 mM NaCl, 540  $\mu\text{M}$   $\text{CaCl}_2$ , 27.5  $\mu\text{M}$   $\text{MnCl}_2$ , pH 7.5.  $s_{20,w}$  values were adjusted with solvent density ( $\rho$ ) of 1.0082 g/mL, solvent viscosity ( $\eta$ ) of 1.0565 cP, and pH 7.5 at 20 °C.

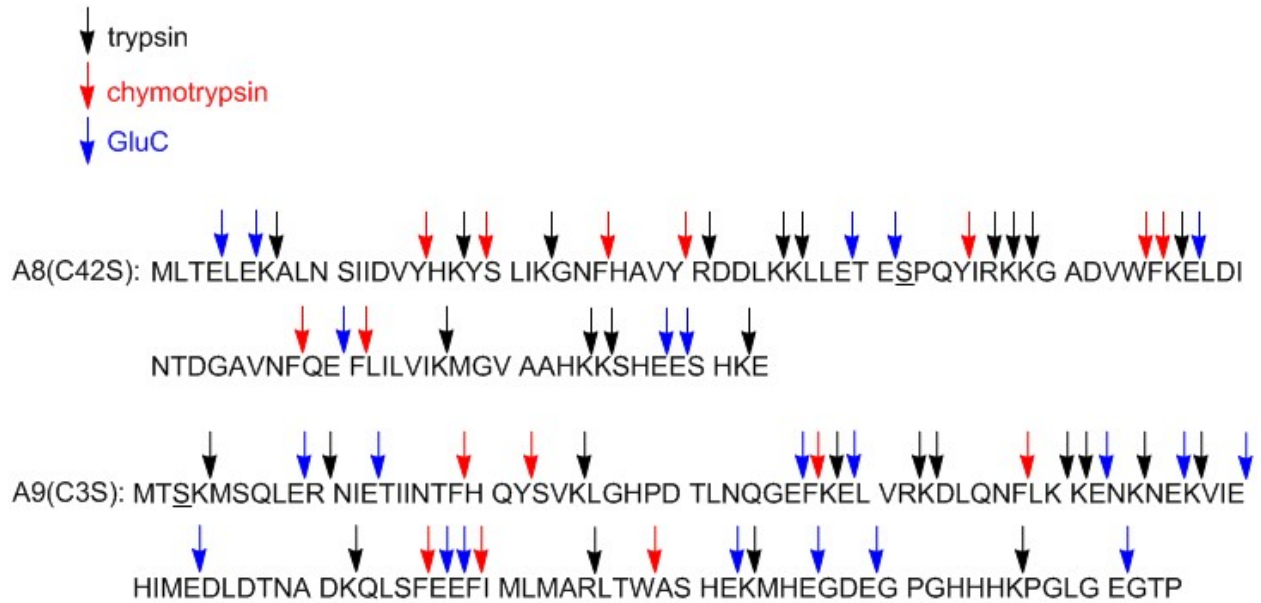

**Fig. S1** Amino acid sequences and potential cleavage sites in human S100A8(C42S) and S100A9(C3S) for trypsin, chymotrypsin (restricted to aromatic amino residues), and GluC (restricted to glutamate residues). Residues mutated from Cys to Ser are underlined. Both subunits have at least seven potential cleavage sites for each protease.



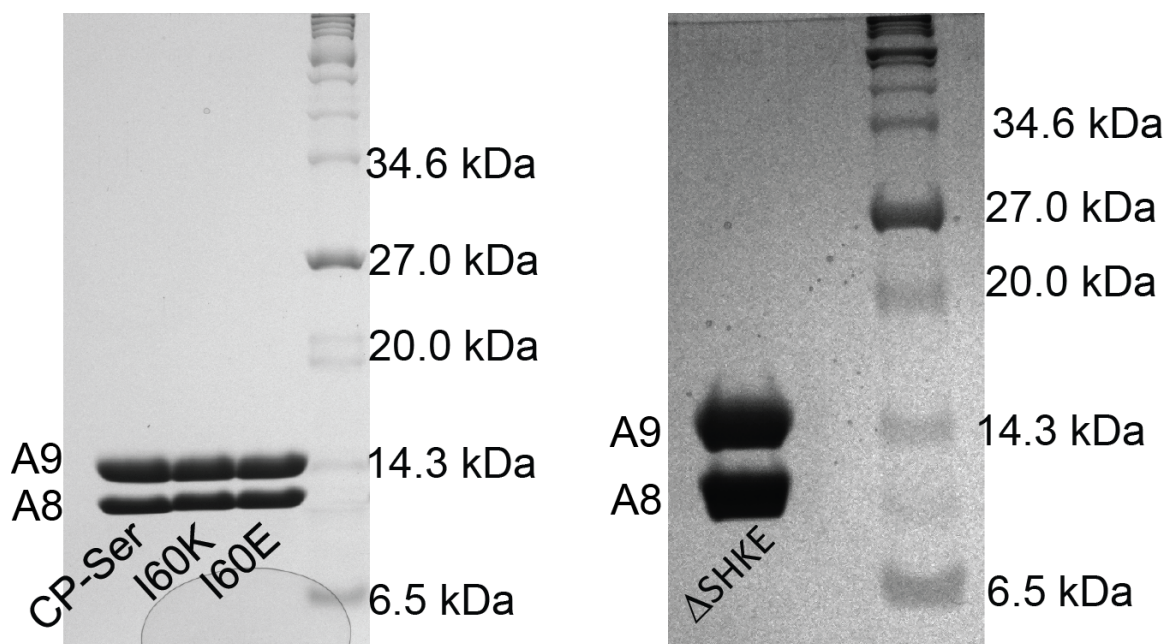

**Fig. S2** SDS-PAGE (15% acrylamide Tris-HCl, glycine gels) visualized with Coomassie Blue of purified CP variants used in this study. The ladder is P7702S from New England Biolabs.

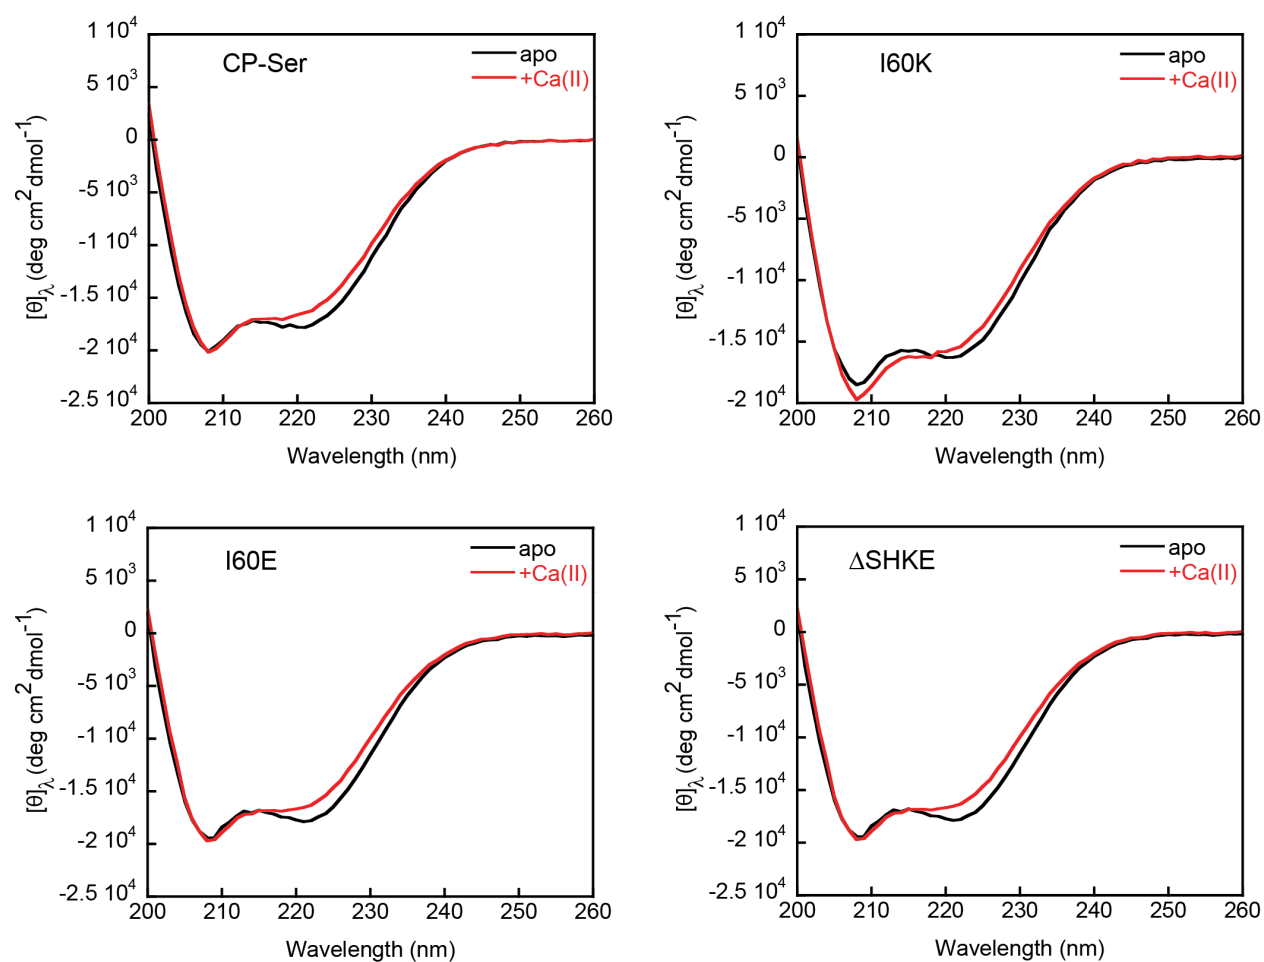

**Fig. S3** Circular dichroism spectra of CP-Ser and variants (10  $\mu\text{M}$ ) in 1 mM Tris, 0.5 mM EDTA,  $\pm 2$  mM  $\text{CaCl}_2$ , pH 8.5 at 25  $^\circ\text{C}$ .

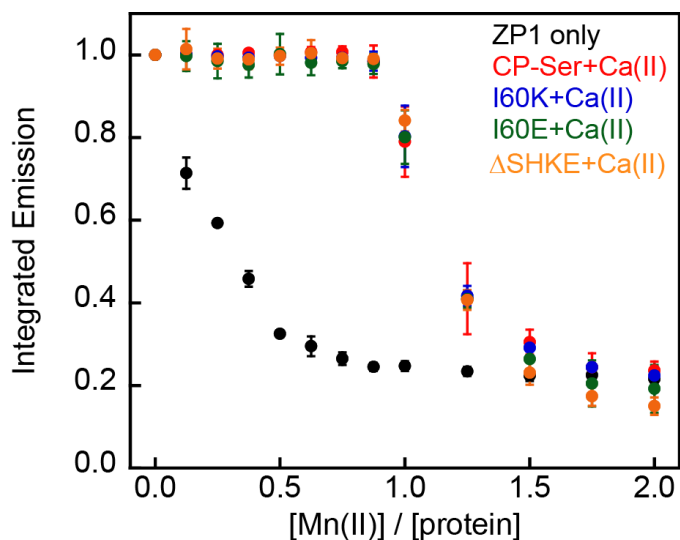

**Fig. S4** Competition between ZP1 (1  $\mu\text{M}$ ) and CP (4  $\mu\text{M}$ ) for Mn(II) in the presence of 200  $\mu\text{M}$  Ca(II) at pH 7.5 (mM HEPES, 100 mM NaCl) and 25  $^{\circ}\text{C}$  (mean  $\pm$  SDM,  $n=3$ ). Excitation was provided at 490 nm, and the emission spectra were integrated from 500 to 650 nm and normalized with respect to apo ZP1 emission.

ZP1 is a fluorescent small molecule that exhibits fluorescence quenching as a result of Mn(II) binding.<sup>S4</sup> Details of the competition experiment are reported elsewhere.<sup>S5</sup> In this experiment, I60K and I60E behave like CP-Ser and out-compete ZP1 for Mn(II), which indicates high-affinity Mn(II) binding in the presence of excess Ca(II). These data do not provide information about the relative apparent  $K_d$  values for Mn(II) for CP-Ser, I60E, and I60K. On the basis of published studies, the  $K_d$  value for Mn(II) binding at the His<sub>6</sub> site in the presence of excess Ca(II) is <10 nM.<sup>S5-S7</sup> The apparent  $K_{d1, \text{Mn(II)}}$  for ZP1 is 550 nM.<sup>S4</sup>

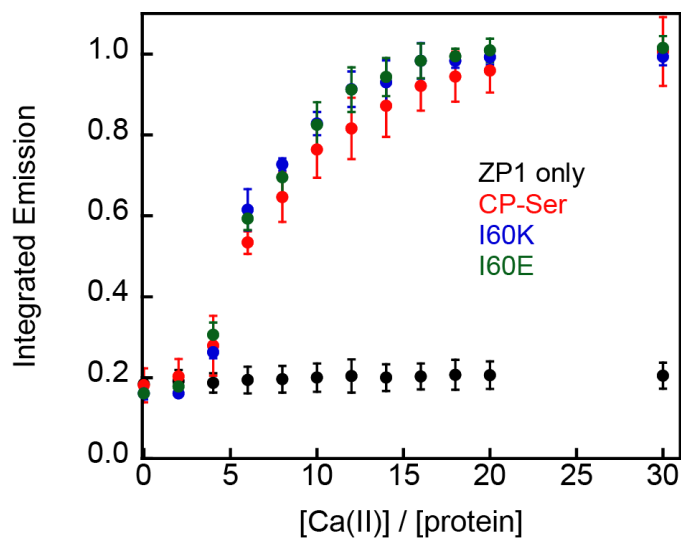

**Fig. S5** Competition between ZP1 (1  $\mu$ M) and CP (4  $\mu$ M) for 3.5  $\mu$ M Mn(II) in the presence of increasing concentrations of Ca(II) at pH 7.5 (mM HEPES, 100 mM NaCl) and 25  $^{\circ}$ C (mean  $\pm$  SDM,  $n=3$ ). Excitation was provided at 490 nm, and the emission spectra were integrated from 500 to 650 nm and normalized with respect to apo ZP1 emission.

This experiment shows that CP-Ser, I60K, and I60E require the same number of Ca(II) equivalents to fully activate high-affinity Mn(II) binding and sequester Mn(II) from ZP1. It does not report on the Ca(II) affinities.

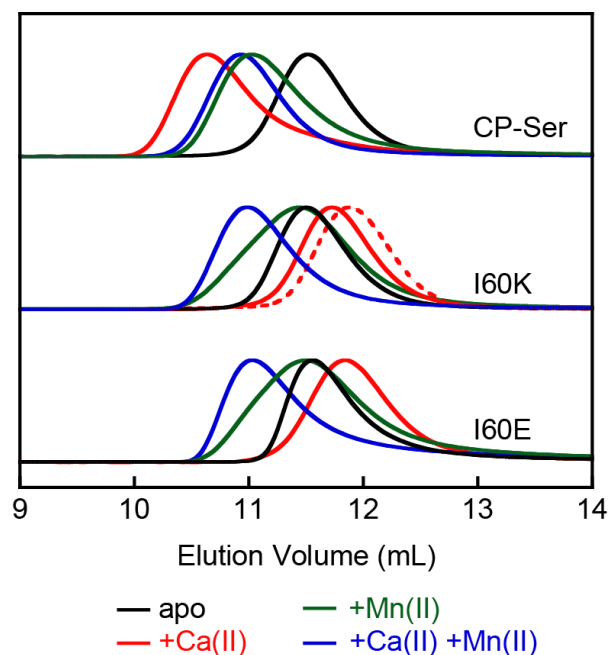

**Fig. S6** Size-exclusion chromatography of CP-Ser, I60K, and I60E (30  $\mu\text{M}$ ) in the presence of Mn(II) and Ca(II). Black traces, no metal added. Red traces, 600  $\mu\text{M}$  Ca(II) included in the sample and running buffer. Blue traces, 300  $\mu\text{M}$  Mn(II) included in the sample only. Green traces, 600  $\mu\text{M}$  Ca(II) included in the sample and running buffer, 33  $\mu\text{M}$  Mn(II) included in the sample only. The black, red and blue traces correspond to the data in **Fig. 2A** of the main text. All chromatograms were normalized to a maximum absorption of 1. Experiments were performed in 75 mM HEPES, 100 mM NaCl, pH 7.5 at 4  $^{\circ}\text{C}$ . The dashed trace represents data from an experiment performed with 500  $\mu\text{M}$  I60K in 75 mM HEPES, 100 mM NaCl, pH 7.5, 10 mM  $\text{CaCl}_2$ .

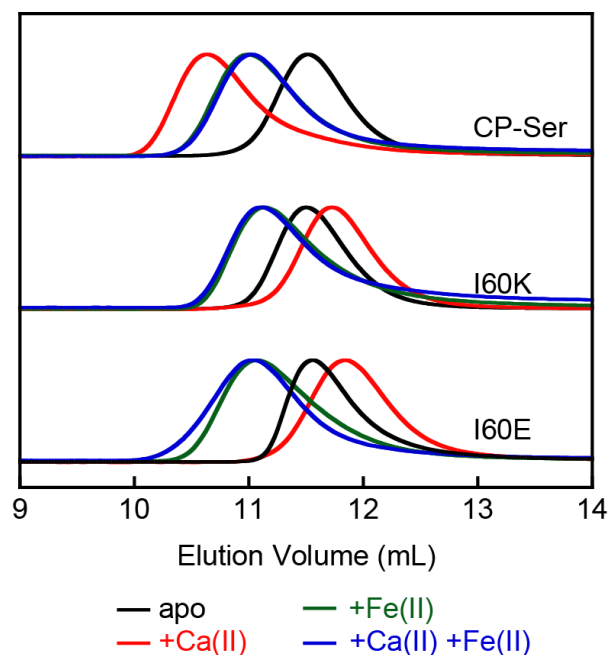

**Fig. S7** Size-exclusion chromatography of CP-Ser, I60K, and I60E (30  $\mu\text{M}$ ) in the presence of Fe(II) and Ca(II). Black traces, no metal added. Red traces, 600  $\mu\text{M}$  Ca(II) included in the sample and running buffer. Blue traces, 300  $\mu\text{M}$  Fe(II) included in the sample only. Green traces, 600  $\mu\text{M}$  Ca(II) included in the sample and running buffer, Fe  $\mu\text{M}$  Mn(II) included in the sample only. The black, red, and blue traces correspond to the data in **Fig. 2B** of the main text. All chromatograms were normalized to a maximum absorption of 1. Experiments were performed in 75 mM HEPES, 100 mM NaCl, pH 7.5 at 4  $^{\circ}\text{C}$ .

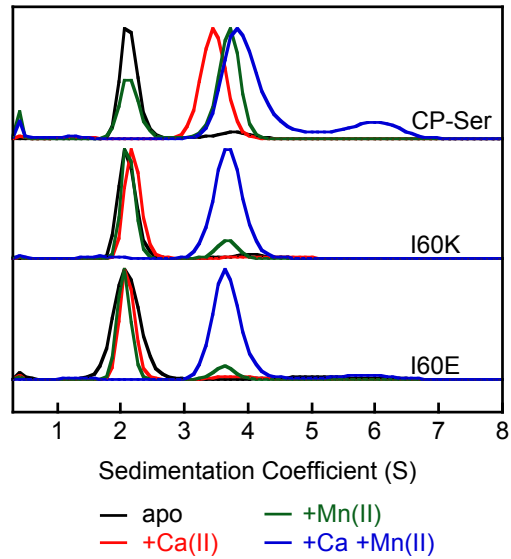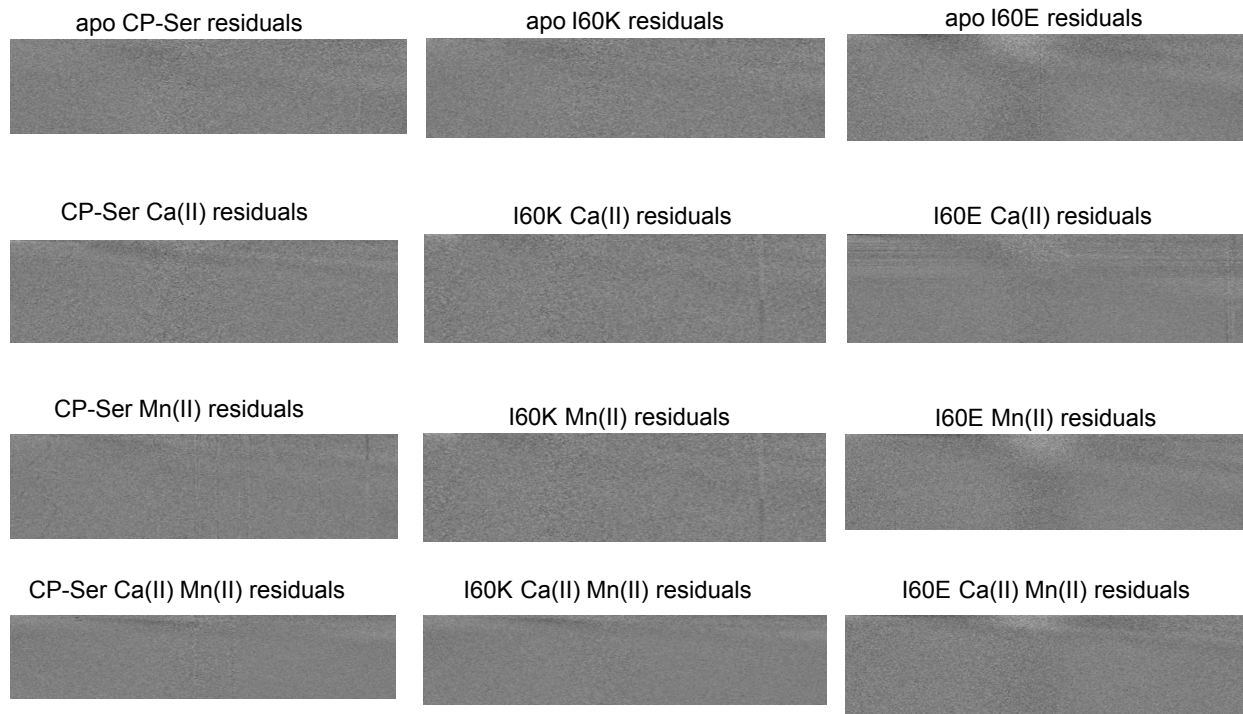

**Fig. S8** Normalized sedimentation coefficient distributions of CP-Ser, I60K, and I60E (27.5  $\mu$ M) and corresponding residuals bitmaps obtained with the  $c(s)$  model in SEDFIT. Buffer: 75 mM HEPES, 100 mM NaCl,  $\pm$ 540  $\mu$ M CaCl<sub>2</sub>,  $\pm$ 27.5  $\mu$ M MnCl<sub>2</sub>, pH 7.5 at 20 °C. For apo CP-Ser, 1.35 mM EDTA was included and no metals were added. The data are normalized to a maximum peak height of 1. Each row of pixels in the bitmaps represents an AUC scan with the pixels representing the residuals between the scan and the fit. Darker pixels indicate greater residuals. Diagonal stripes in the bitmaps indicate systematic errors in the fitting. For more information visit: [http://www.analyticalultracentrifugation.com/sedfit\\_help\\_residuals\\_bitmap.htm](http://www.analyticalultracentrifugation.com/sedfit_help_residuals_bitmap.htm)

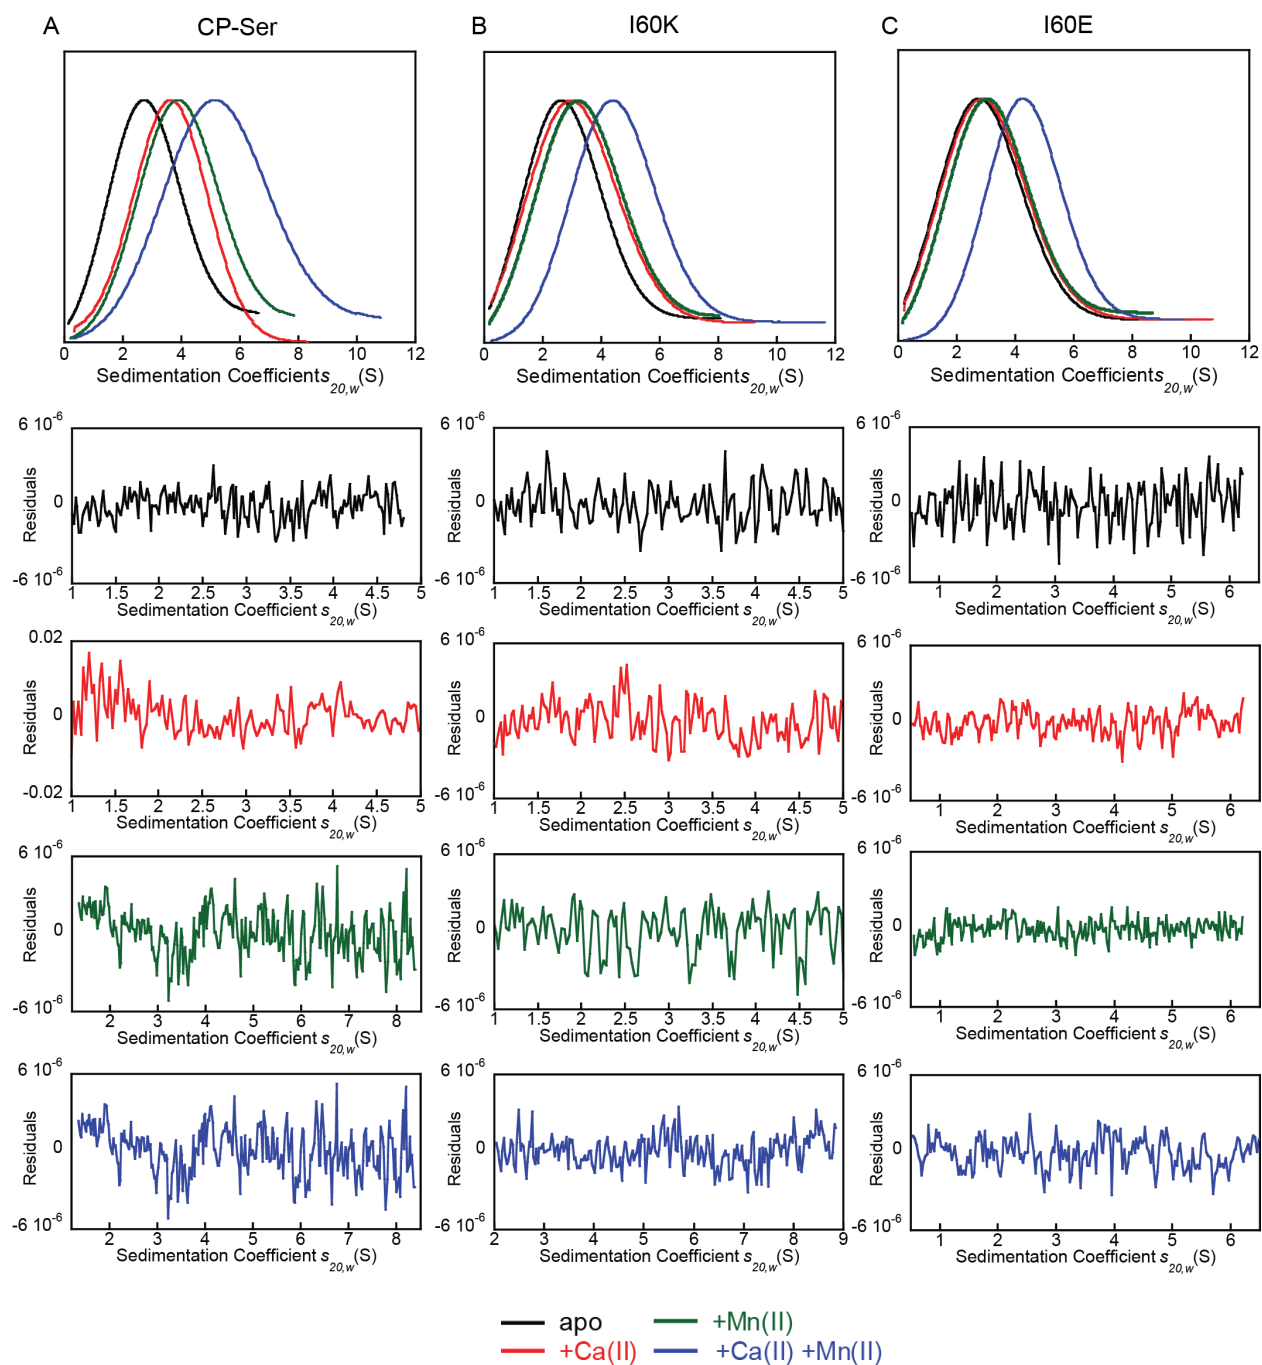

**Fig. S9** Sedimentation coefficient distributions and corresponding residuals plots of CP-Ser (A), I60K (B), and I60E (C) (27.5  $\mu$ M) obtained using DCDT+. Buffer: 75 mM HEPES, 100 mM NaCl,  $\pm$ 540  $\mu$ M CaCl<sub>2</sub>,  $\pm$ 27.5  $\mu$ M MnCl<sub>2</sub>, pH 7.5 at 20 °C. For apo CP-Ser, 1.35 mM EDTA was included and no metals were added. The data are normalized to a maximum peak height of 1.



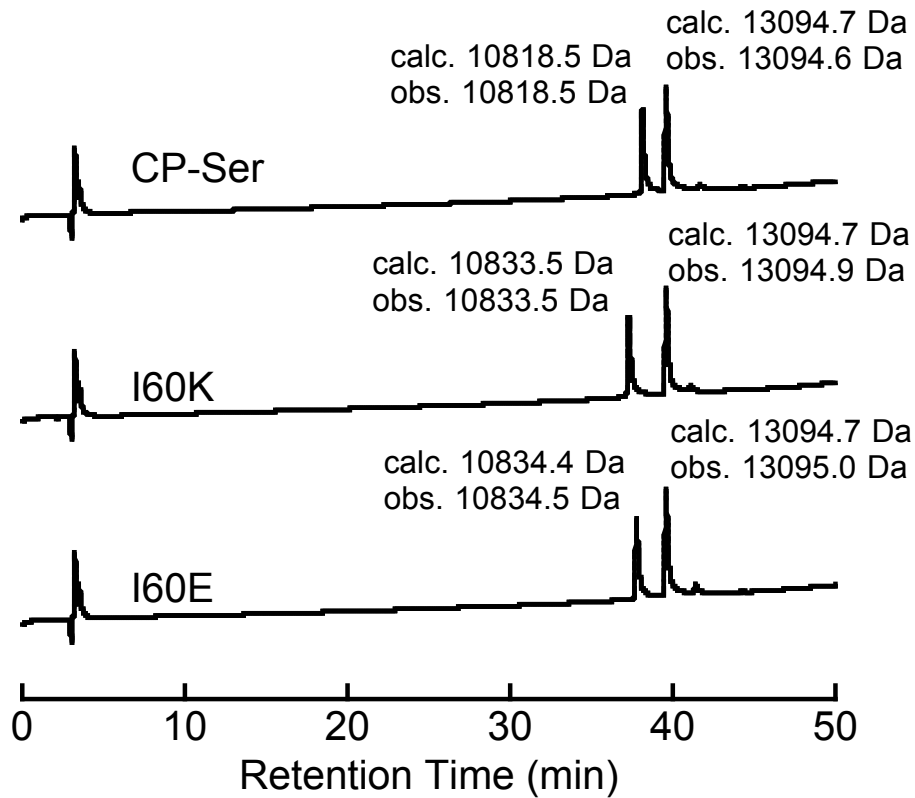

**Fig. S10** HPLC chromatograms of CP-Ser, I60E, and I60K (10–60% B over 50 min, 1 mL/min) with corresponding MS data. The peaks for the S100A8 subunits have retention times of  $\approx 38$  min and the S100A9 subunit peak occurs at 39.8 min.

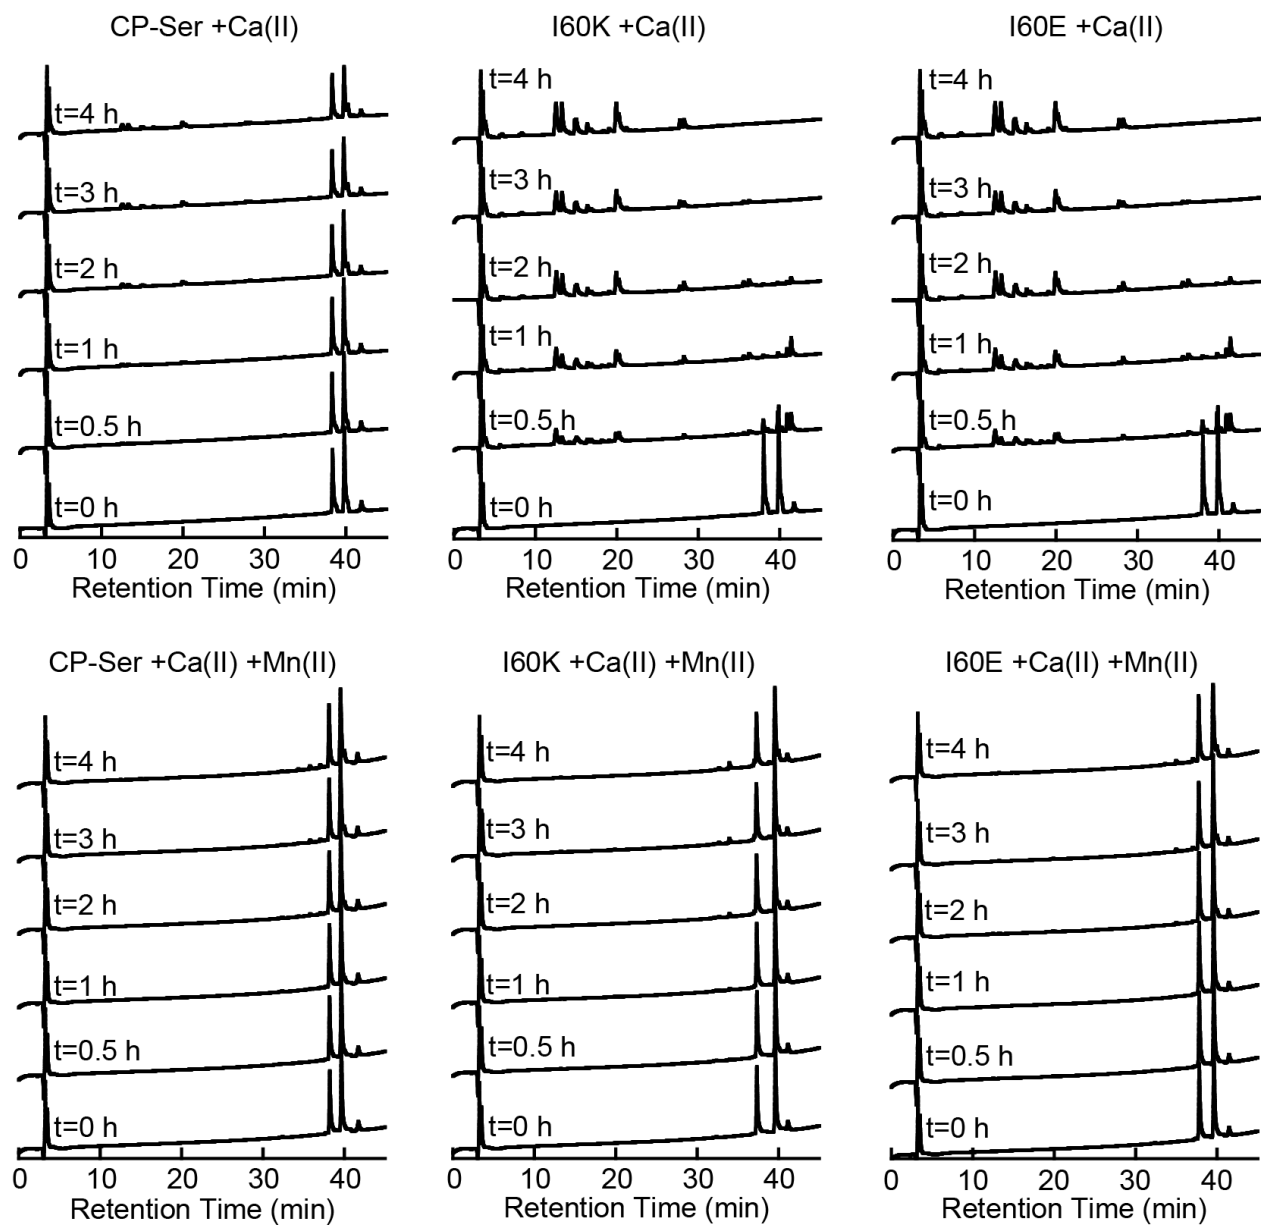

**Fig. S11** Full HPLC chromatograms of trypsin ( $0.45 \mu\text{M}$ ) digestions of CP-Ser, I60E, and I60K ( $30 \mu\text{M}$ ) in  $75 \text{ mM HEPES } 100 \text{ mM NaCl, } 1.5 \text{ mM CaCl}_2, \pm 30 \mu\text{M MnCl}_2$ , pH 7.5, performed at  $37^\circ\text{C}$ . These chromatograms correspond to the data presented in **Fig. 4** of the main text.

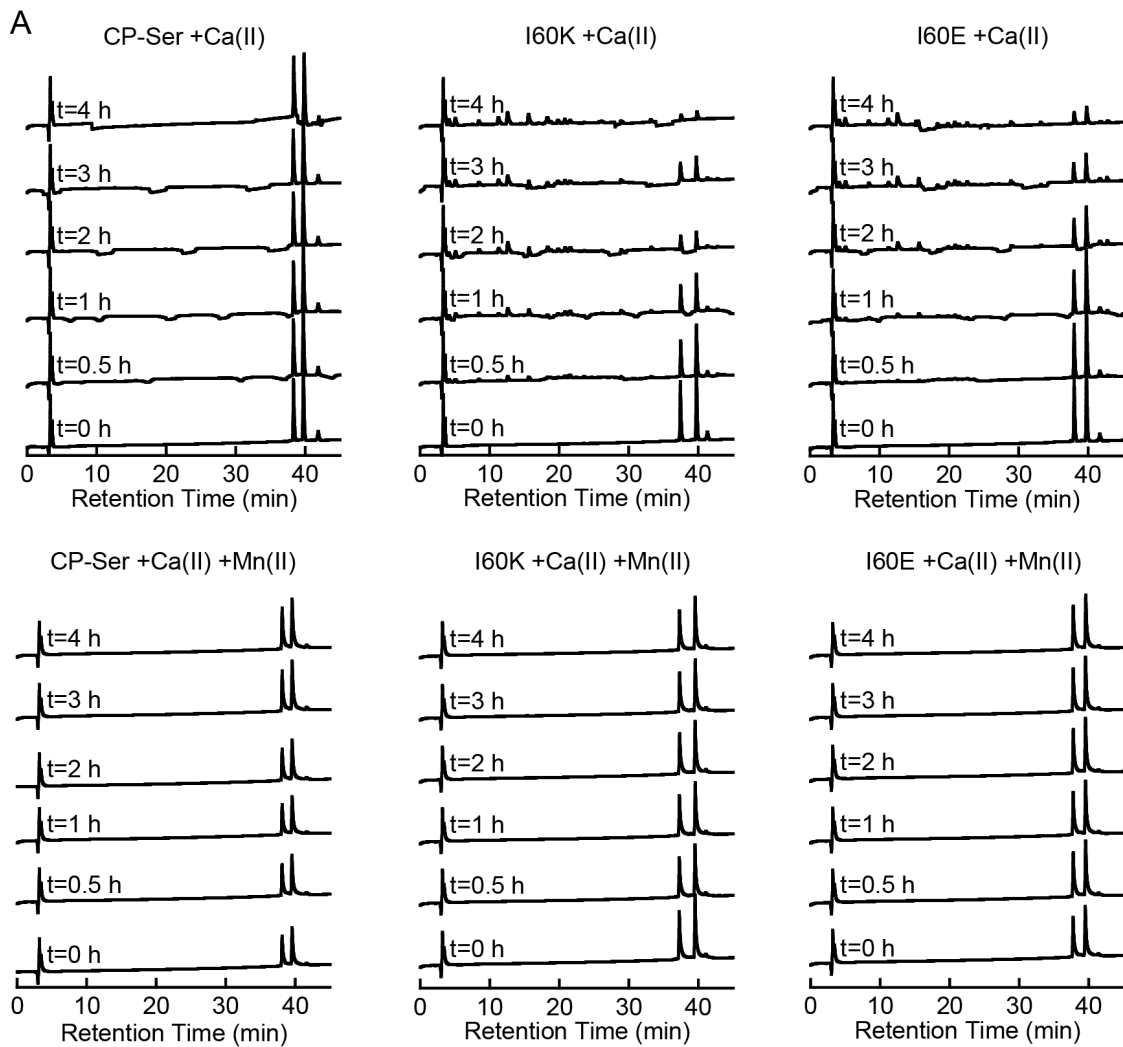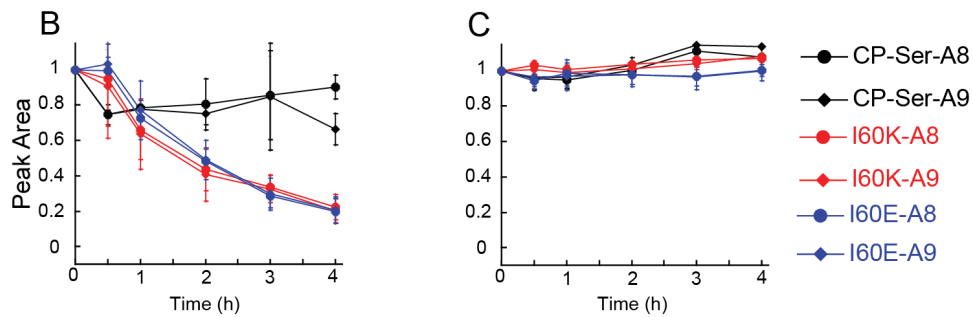

**Fig. S12** Susceptibility of Ca(II)-bound CP-Ser, I60E and I60K to degradation by chymotrypsin (0.3  $\mu$ M). (A) Representative full HPLC traces illustrating the S100A8 and S100A9 subunits following incubation with chymotrypsin for 0–4 h at 37  $^{\circ}$ C. Digestions were carried out in 75 mM HEPES, 100 mM NaCl, pH 7.5, 1.5 mM CaCl<sub>2</sub>,  $\pm$ 30  $\mu$ M MnCl<sub>2</sub>. (B) S100A8 and S100A9 integrated peak areas as a function of time in the presence of Ca(II) (mean  $\pm$ SDM,  $n=3$ ). (C) S100A8 and S100A9 integrated peak areas as a function of time in the presence of Ca(II) and Mn(II) (mean  $\pm$ SDM,  $n=3$ ). The area for each  $t=0$  peak was normalized to 1.

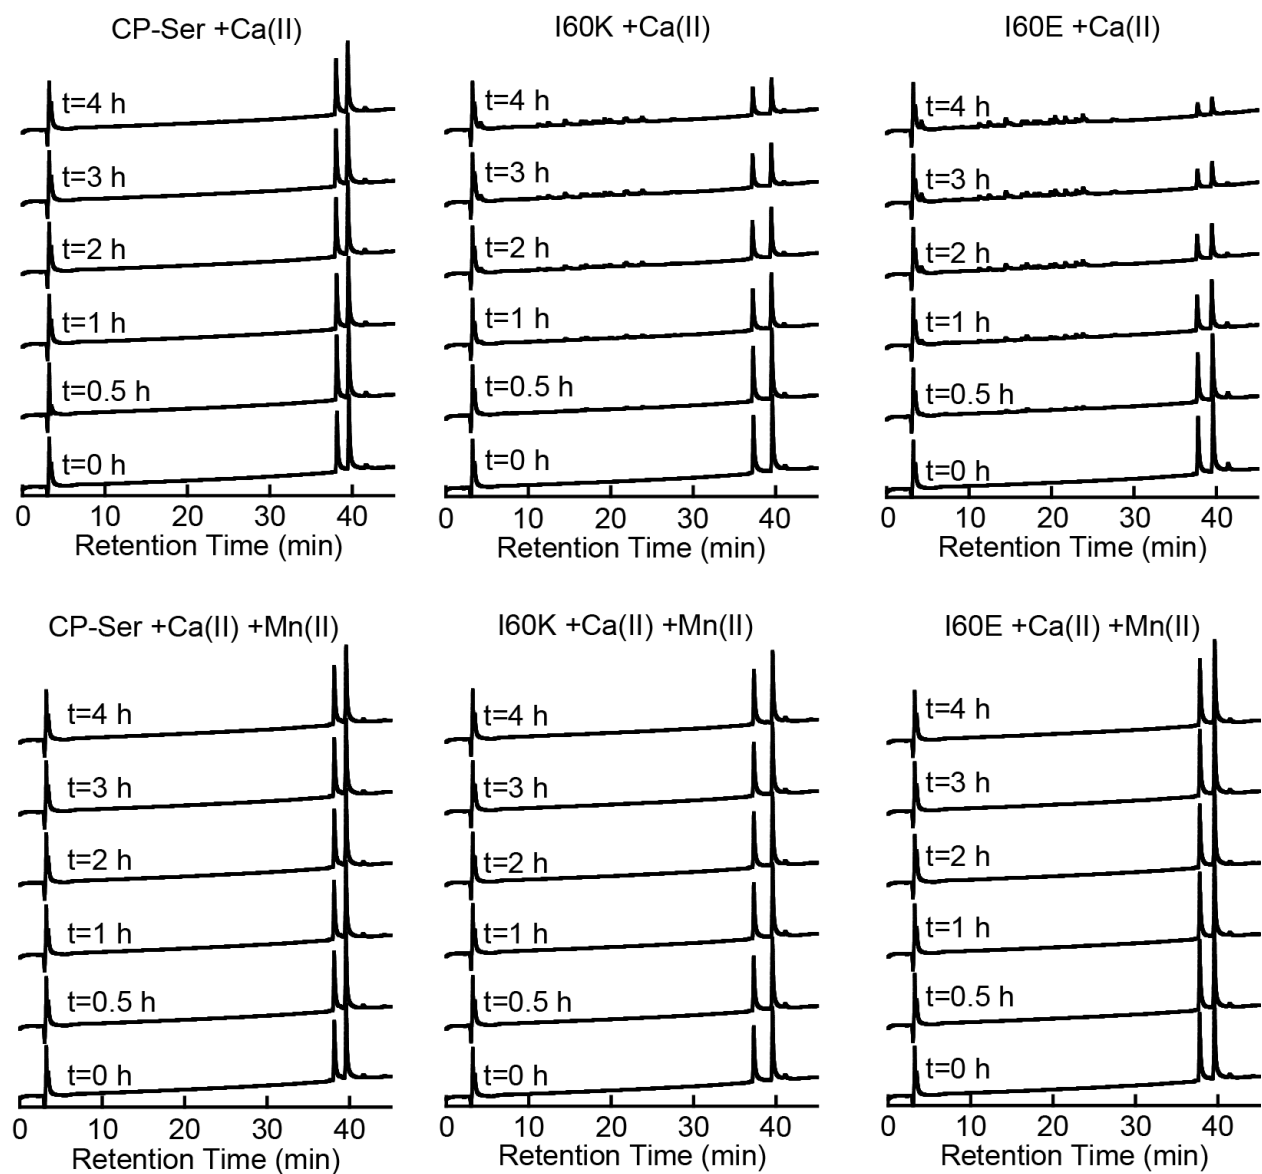

**Fig. S13** Full HPLC chromatograms of human neutrophil elastase (0.3  $\mu\text{M}$ ) digestions of CP-Ser, I60K, I60E (30  $\mu\text{M}$ ) in 75 mM HEPES 100 mM NaCl, 1.5 mM  $\text{CaCl}_2$ ,  $\pm$  30  $\mu\text{M}$   $\text{MnCl}_2$ , pH 7.5 performed at 37  $^\circ\text{C}$ . These chromatograms correspond to the data presented in **Fig. 5** of the main text.

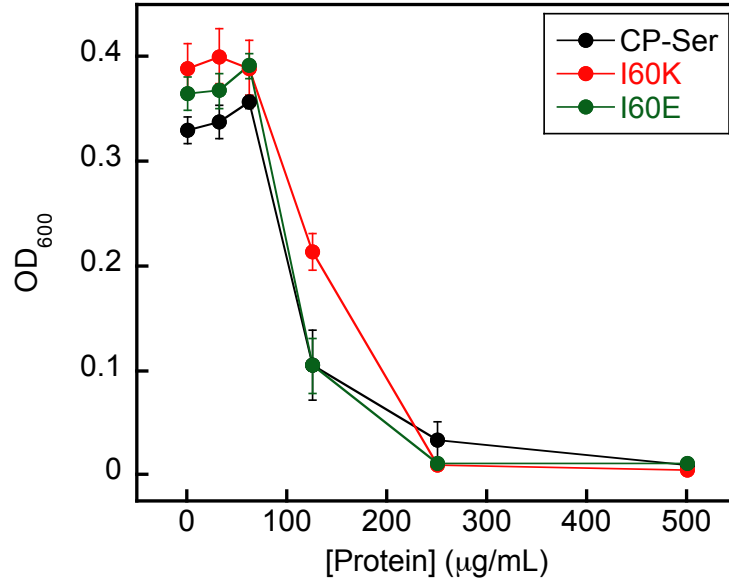

**Fig. S14** Antibacterial activity of CP-Ser, I60K, and I60E against *E. coli* ATCC 25922 in the presence of  $\approx 2$  mM  $\text{CaCl}_2$  in the AMA medium. The OD<sub>600</sub> values were recorded at t = 20 h. Mean  $\pm$ SEM for three independent replicates ( $n=9$ ).

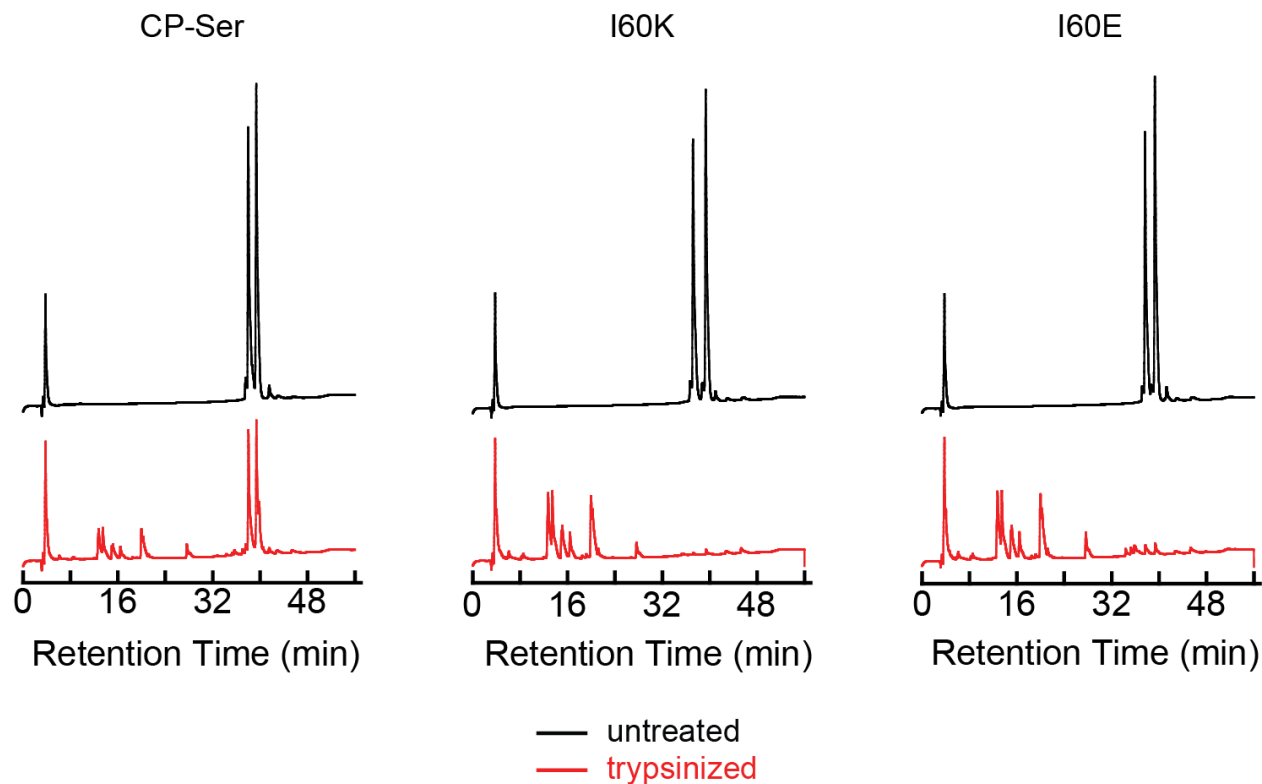

**Fig. S15** HPLC chromatograms (10–60% B over 50 min, 1 mL/min) of proteins employed in the antibacterial activity assays evaluating the effect of pre-incubation with trypsin. The proteins (210  $\mu$ M) were incubated at 37  $^{\circ}$ C in 20 mM Tris, 100 mM NaCl, 3 mM CaCl<sub>2</sub>, pH 7.5,  $\pm$ 0.45  $\mu$ M trypsin for  $\approx$ 20 h prior to the antimicrobial activity assays. The HPLC traces were acquired following the  $\approx$ 20 h incubation. The data for the antimicrobial activity assays are presented in **Fig. 6** of the main text.

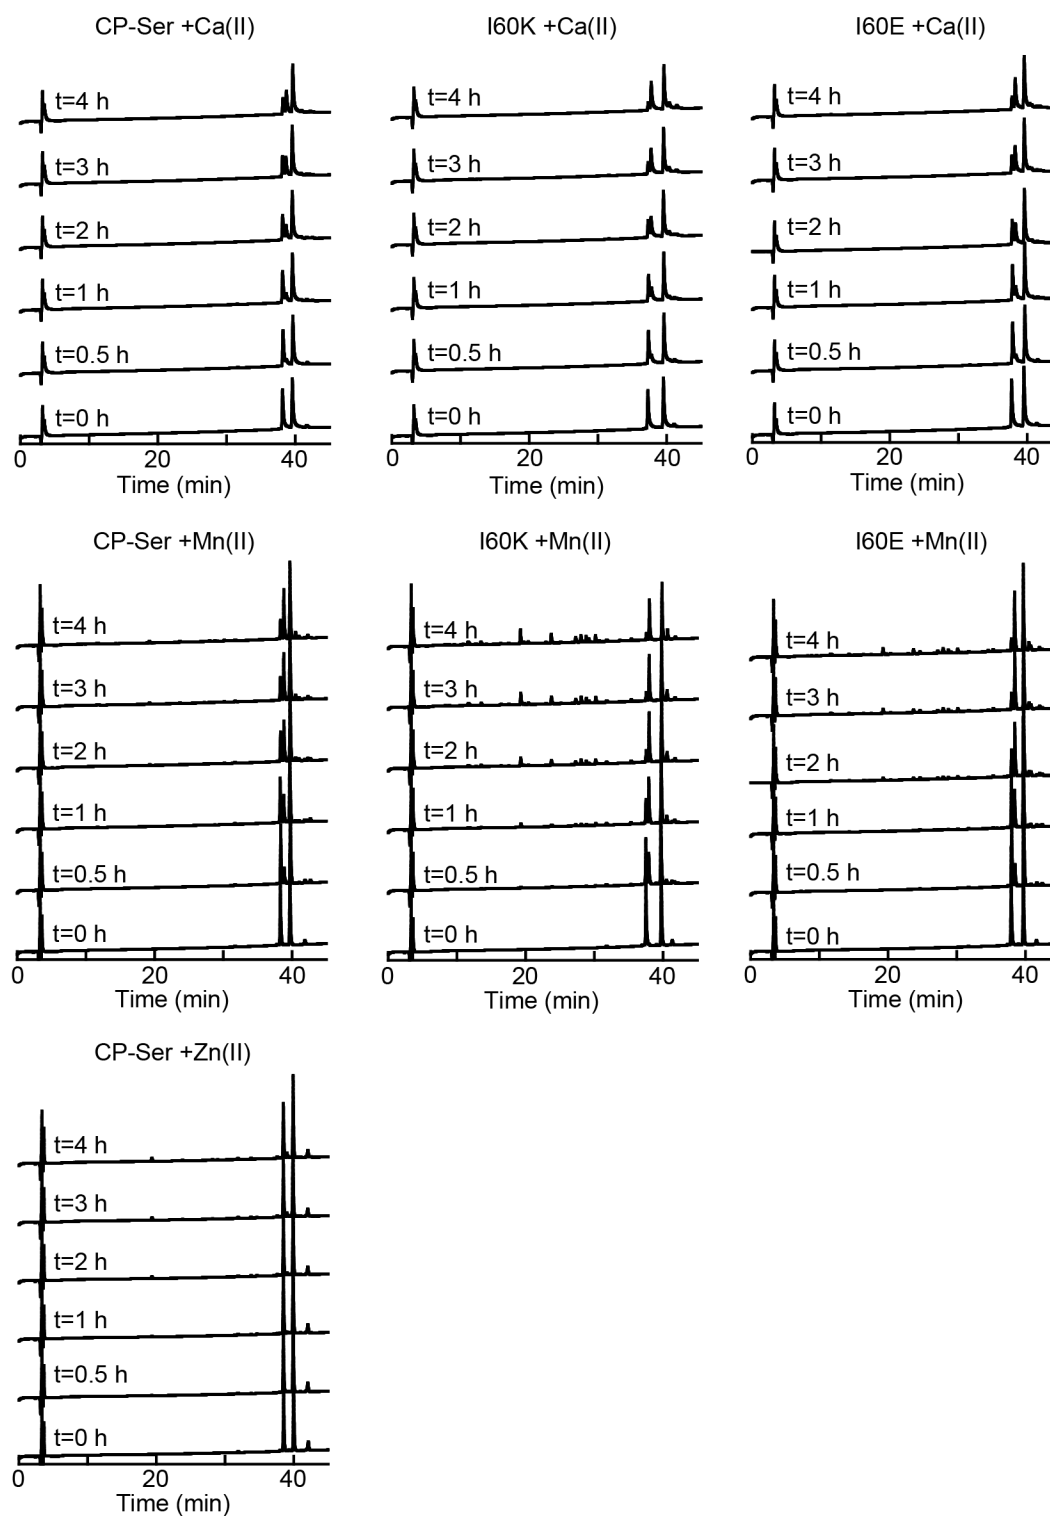

**Fig. S16** Full HPLC chromatograms of GluC (0.3  $\mu\text{M}$ ) digestions of CP-Ser, I60K, I60E (30  $\mu\text{M}$ ) in 75 mM HEPES 100 mM NaCl,  $\pm 1.5$  mM  $\text{CaCl}_2$ ,  $\pm 30$   $\mu\text{M}$   $\text{MnCl}_2$ , pH 7.5. A digestion of CP-Ser with 60  $\mu\text{M}$   $\text{ZnCl}_2$  is also shown. All experiments were performed at 37  $^\circ\text{C}$ . These chromatograms correspond to the data presented in **Fig. 7** of the main text.

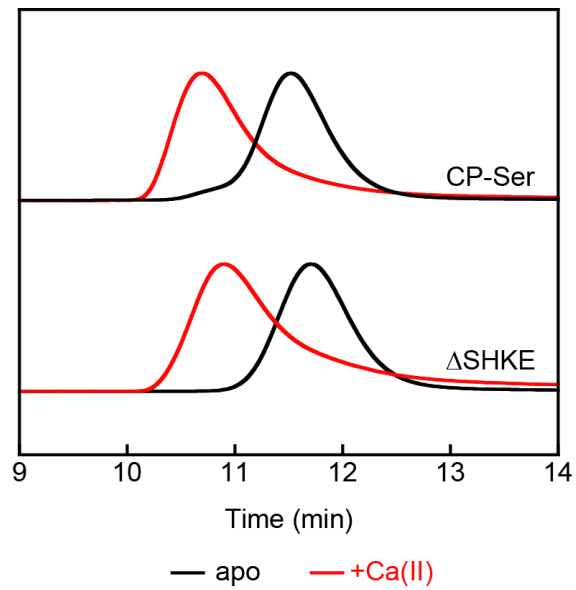

**Fig. S17** Size-exclusion chromatography of CP-Ser and  $\Delta$ SHKE (30  $\mu$ M) performed with no metal added (black trace) and 600  $\mu$ M Ca(II) included in the sample and running buffer (red trace). The chromatograms were normalized to a maximum absorption of 1. Experiments were performed in 75 mM HEPES, 100 mM NaCl, pH 7.5 at 4 °C.



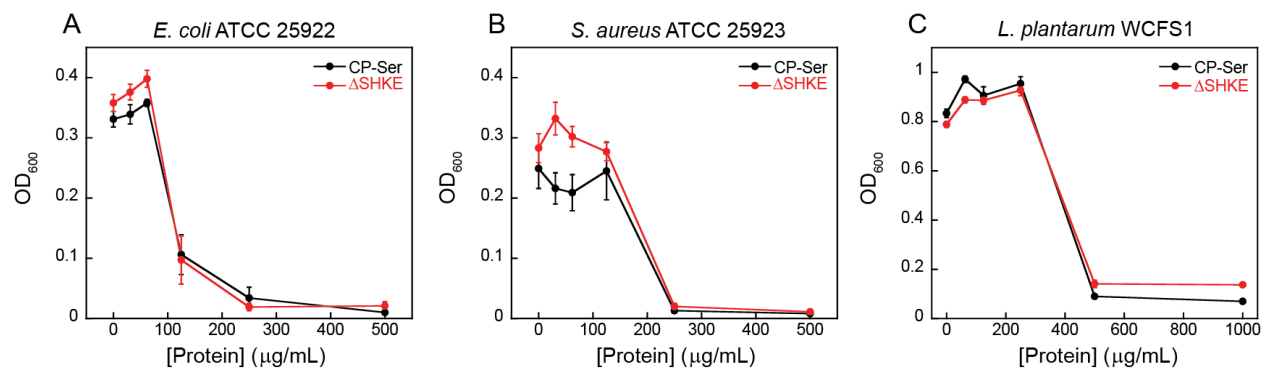

**Fig. S18** Antibacterial activity of CP-Ser and  $\Delta$ SHKE against *E. coli* ATCC 25922 (A), *S. aureus* ATCC 25923 (B), *L. plantarum* WCSF1 (C) with 2 mM  $\text{CaCl}_2$  in the AMA medium. The  $OD_{600}$  values were recorded at  $t = 20$  h. Averages  $\pm$ SEM for three independent replicates ( $n=9$ ).

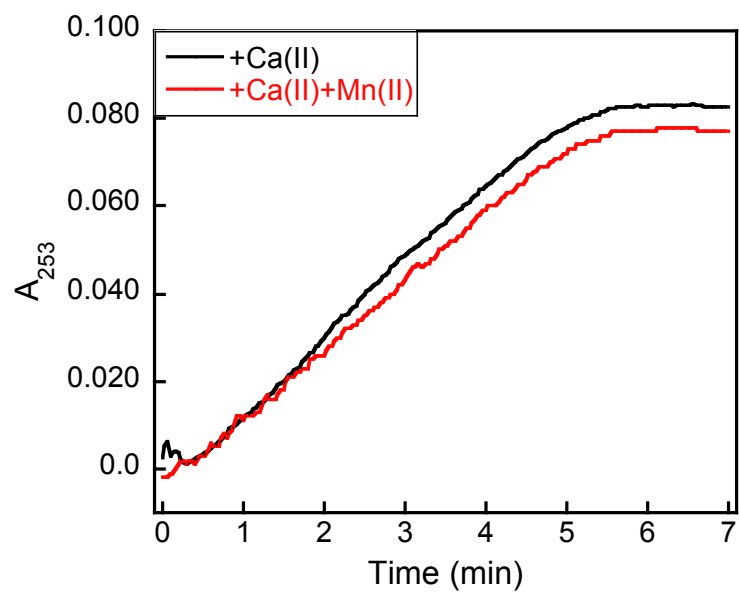

**Fig. S19** Effect of Mn(II) on trypsin activity. Trypsin activity was monitored by *N*-benzoyl-L-arginine ethyl ester cleavage in 75 mM HEPES, 100 mM NaCl, pH 7.5, 1.5 mM Ca(II),  $\pm 30 \mu\text{M}$  MnCl<sub>2</sub>. Averages of three trials are shown.

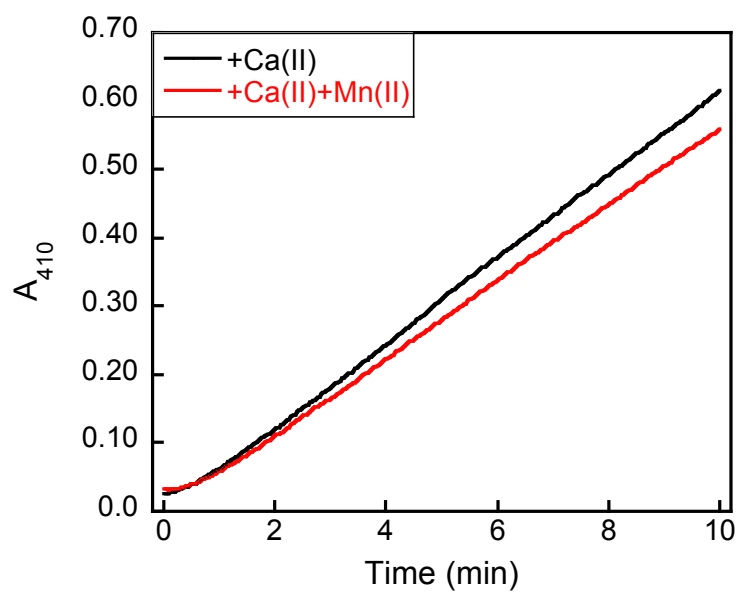

**Fig. S20** Effect of Mn(II) on chymotrypsin activity. Activity of chymotrypsin was monitored by cleavage of *N*-Succinyl-Ala-Ala-Pro-Phe *p*-nitroanilide in 75 mM HEPES, 100 mM NaCl, pH 7.5, 1% DMF, 1.5 mM CaCl<sub>2</sub>, ±30 μM MnCl<sub>2</sub> at 25 °C. Averages of three experiments are shown.

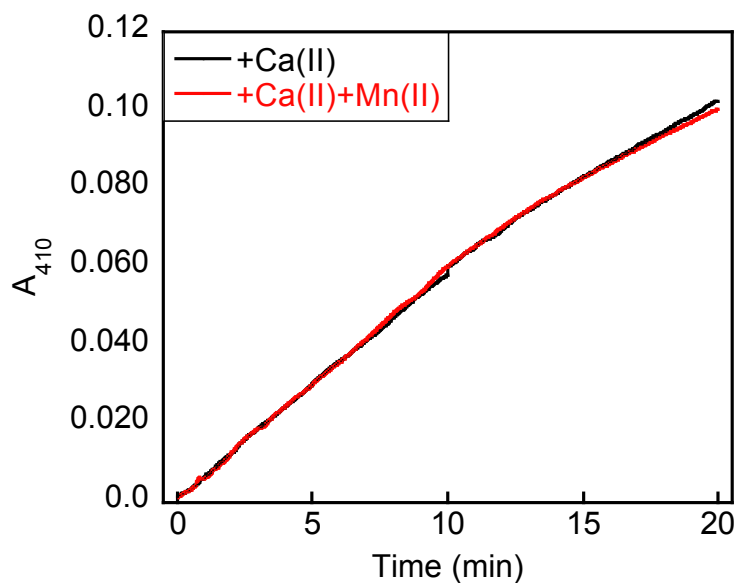

**Fig. S21** Effect of Mn(II) on human neutrophil elastase activity. Activity of human neutrophil elastase was monitored by cleavage of *N*-Succinyl-Ala-Ala-Val-Ala *p*-nitroanilide in 75 mM HEPES, 100 mM NaCl, pH 7.5, 5% DMSO, 1.5 mM CaCl<sub>2</sub>, ±30 μM MnCl<sub>2</sub> at 25 °C. Averages of three experiments are shown.

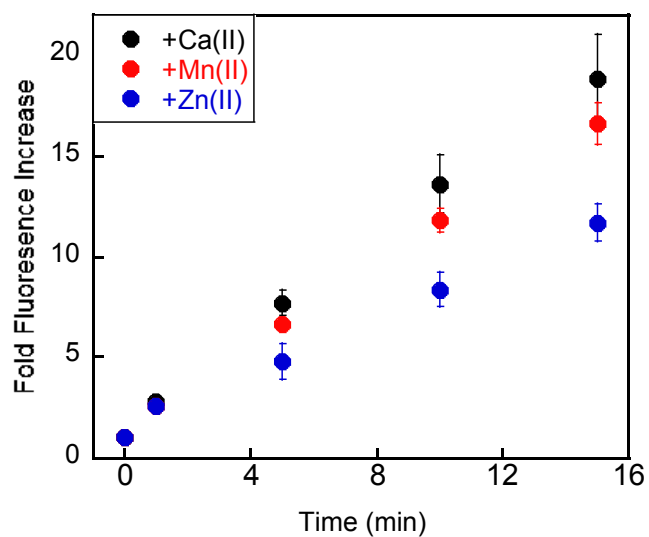

**Fig. S22** Effect of Mn(II) and Zn(II) on GluC activity. Activity of GluC as monitored by cleavage of carboxybenzyl-Leu-Leu-Glu- $\beta$ -naphthylamide in 75 mM HEPES, 100 mM NaCl, 10% DMSO, pH 7.5 with 1.5 mM CaCl<sub>2</sub>, 30  $\mu$ M MnCl<sub>2</sub>, 60  $\mu$ M ZnCl<sub>2</sub> (average  $\pm$ SDM,  $n=3$ ). The zinc conditions also contained 30  $\mu$ M CP-Ser because precipitation occurred when Zn(II) was added to solutions of substrate.

### Supplementary References

- (S1) M. B. Brophy, J. A. Hayden, E. M. Nolan, *J. Am. Chem. Soc.* 2012, **134**, 18089-18100.
- (S2) E. Shaw, M. Mares-Guia and W. Cohen, *Biochemistry*, 1965, **4**, 2219-2224.
- (S3) M. M. Santoro and D. W. Bolen, *Biochemistry*, 1988, **27**, 8063-8068.
- (S4) Y. You, E. Tomat, K. Hwang, T. Atanasijevic, W. Nam, A. P. Jasanoff and S. J. Lippard, *Chem. Commun.* 2010, **46**, 4139-4141.
- (S5) J. A. Hayden, M. B. Brophy, L. S. Cunden and E. M. Nolan, *J. Am. Chem. Soc.* 2013, **135**, 17804-17817
- (S6) T. E. Kehl-Fie, S. Chitayat, M. I. Hood, S. Damo, N. Restrepo, C. Garcia, K. A. Munro, W. J. Chazin, and E.P. Skaar, *Cell Host Microbe*, 2011, **10**, 158-164.
- (S7) M. B. Brophy and E. M. Nolan, *ACS Chem. Biol.*, 2015, **10**, 641-651.
